# Supplementary material for: Multiple correlations between spin crossover and fluorescence in a dinuclear compound
Source: Royal Society of Chemistry journal article supplement (doi:10.1039/c6cc07810a), 2016-01-01
Supplement: c6cc07810a1.pdf [file c6cc07810a1.pdf]

Supporting Information

for

## **Multiple Correlations Between Spin Crossover and Fluorescence in a Dinuclear Compound**

Chun-Feng Wang,<sup>a,b</sup> Ming-Jun Sun,<sup>a</sup> Qi-Jie Guo,<sup>a</sup> Ze-Xing Cao,<sup>\*,a</sup> Lan-Sun Zheng<sup>a</sup> and Jun Tao<sup>\*,a,b</sup>

<sup>a</sup>State Key Laboratory of Physical Chemistry of Solid Surfaces and Department of Chemistry,  
College of Chemistry and Chemical Engineering, Xiamen University, Xiamen 361005, People's  
Republic of China.

<sup>b</sup>Key Laboratory of Cluster Science of Ministry of Education, School of Chemistry and Chemical  
Engineering, Beijing Institute of Technology, Beijing 102488, People's Republic of China.

E-mail: taojun@xmu.edu.cn; zxcao@xmu.edu.cn; taojun@bit.edu.cn.

## Table of Contents

|                                                                                                                                                                                                                                              |     |
|----------------------------------------------------------------------------------------------------------------------------------------------------------------------------------------------------------------------------------------------|-----|
| 1. Materials and Methods                                                                                                                                                                                                                     | S4  |
| 2. Syntheses                                                                                                                                                                                                                                 | S4  |
| 3. Computational Methods                                                                                                                                                                                                                     | S5  |
| 4. Additional Tables                                                                                                                                                                                                                         |     |
| Table S1 Elemental analyses                                                                                                                                                                                                                  | S8  |
| Table S2 Crystal data and structure refinement                                                                                                                                                                                               | S8  |
| Table S3 Comparison of bond lengths of experimental and theoretical data                                                                                                                                                                     | S9  |
| Table S4 Metal-ligand and metal-metal bond distances for optimized geometries of low-spin state of <b>1</b> using a great number of DFT functional, and the experimental values are also displayed. The temperature is set to 100 K          | S9  |
| Table S5 Metal-ligand and metal-metal average bond distances for optimized geometries of different spin states of <b>1</b> at the PBE1PBE/6-311G(d,p) level, and the experimental values are also shown. The calculated temperature is 300 K | S10 |
| Table S6 The predicted excitation energies for the lowest 60 transitions of <b>1</b> in hs and ls states                                                                                                                                     | S10 |
| Table S7 Optimized geometry of <b>1</b> in the high-spin state                                                                                                                                                                               | S12 |
| Table S8 Optimized geometries of <b>1</b> in the low-spin state                                                                                                                                                                              | S18 |
| 5. Additional Figures                                                                                                                                                                                                                        |     |
| Fig. S1 Crystal structure of <b>1</b>                                                                                                                                                                                                        | S19 |
| Fig. S2 Magnetic properties of <b>1</b>                                                                                                                                                                                                      | S19 |
| Fig. S3 Fluorescent emission spectra of <b>1</b> and pnm at RT                                                                                                                                                                               | S20 |
| Fig. S4 T-dependent fluorescent spectra of pnm                                                                                                                                                                                               | S20 |

|                                                                                      |     |
|--------------------------------------------------------------------------------------|-----|
| Fig. S5 T-dependent fluorescent spectra of <b>1</b> .....                            | S21 |
| Fig. S6 Experimental and theoretical spectra of <b>1</b> at hs state.....            | S23 |
| Fig. S7 Experimental and theoretical spectra of <b>1</b> at ls state.....            | S24 |
| Fig. S8 Molecular orbitals of $S_0 \rightarrow S_1$ transition for the hs state..... | S25 |
| Fig. S9 Molecular orbitals of $S_0 \rightarrow S_1$ transition for the ls state..... | S26 |
| Fig. S10 Theoretical electronic absorption spectrum of pnm.....                      | S27 |
| Fig. S11 Optimized crystal structures of <b>1</b> in ls and hs states.....           | S27 |
| Fig. S12 Electron spin density of <b>1</b> in hs and ls states.....                  | S28 |
| Fig. S13 Normalized diffuse reflectivity spectra of pnm.....                         | S38 |
| Fig. S14 Normalized excitation and emission spectra of pnm.....                      | S29 |
| 5. References.....                                                                   | S30 |

## 1. Materials and Methods

Ammonium thiocyanate and 4-NH<sub>2</sub>-1,2,4-triazole were purchased from Aladdin and Alfa Aesar, respectively. Iron(II) chloride tetrahydrate and Benzaldehyde were obtained from Tianjin Chemical Reagent Company (China). Ascorbic acid and all solvents were purchased from Sinopharm Chemical Reagent Co., Ltd. All starting materials were used without further purification.

Solid-state emission spectra of fluorescence were measured on an Edinburgh FLS 980 fluorescence spectrophotometer. Absorbance spectra of the ligand were recorded on a Shimadzu UV2550 spectrophotometer with scan rate of 600 nm min<sup>-1</sup>. Infrared spectra (KBr pellets) were recorded in the range of 400–4000 cm<sup>-1</sup> on a Nicolet 5DX spectrometer. Elemental analyses for C, H, N and S were performed on a Vario EL III elemental analyzer. Diffuse reflectance spectra (DRS) were obtained with a Varian Cary 5000 UV–Vis spectrometer with scan rate of 600 nm min<sup>-1</sup> using BaSO<sub>4</sub> as a reference. Magnetic measurements were carried out on a Quantum Design MPMS XL7 magnetometer working in the 2–300 K temperature range with 1 K min<sup>-1</sup> sweeping rate under a magnetic field of 5000 Oe. The solid-state fluorescence and magnetic properties were measured on fresh crystalline samples with a drop of mother liquor.

## 2. Syntheses

(E)-phenyl-N-(4H-1,2,4-triazol-4-yl)methanimine (pnm): 4-NH<sub>2</sub>-1,2,4-triazole (2.100 g, 24.0 mmol) was dissolved in 20 mL ethanol and benzaldehyde (2.547 g, 24.0 mmol) was added, then the mixture was refluxed for 5 h. The reaction solution was then left undisturbed at room temperature

for half an hour. The formed white solid products were dried under vacuum overnight. The final material was denoted as pnm.

Compound **1**: 10 mL methanol solution of pnm (0.225 g, 1.3 mmol) was added at room temperature into a 10 mL methanol solution containing iron(II) chloride tetrahydrate (0.100g, 0.5 mmol), ammonium thiocyanate (0.076 g, 1.0 mmol) and ascorbic acid (0.030 g). The mixture was stirred for 5 minutes and the color of solution changed from limpid to yellow. The resulting solution was then kept for 2 hours to give large yellow crystals of **1**. (0.161 g, yield = 52 %). FTIR (KBr pellets): 562, 591, 624, 690, 752, 763, 1023, 1061, 1170, 1226, 1291, 1310, 1384, 1448, 1525, 1574, 1600, 1619, 2068, 3104, 3432. Elemental analysis calcd (%) for **1** (C<sub>49</sub>H<sub>40</sub>N<sub>24</sub>S<sub>4</sub>Fe<sub>2</sub>): C 48.84, H 3.34, N 27.89, S 10.64; found: C 48.82, H 3.35, N 27.90, S 10.64.

### 3. Theoretical Calculations

#### Methodology

Various density functional theory (DFT) approaches, including a series of pure functionals (BP86, PW91, PBE, and M11-L), popular hybrid functionals (B3LYP, PBE1PBE, M06), and long range corrected functionals (HSEH1PBE,  $\omega$ B97X, and LC- $\omega$ PBE), have been evaluated based on the experimental structure of dinuclear Fe(II) complex in the low-spin state, in order to determine a suitable functional for TD-DFT and DFT calculations on these systems. All DFT calculations are carried out with the Gaussian 09 program.<sup>1</sup> Here the LanL2DZ basis set augmented with polarization functions (Fe( $\zeta$ f)=2.462 and S( $\zeta$ d)=0.421)<sup>2</sup> is chosen to describe Fe and S atoms, and

the basis set of 6-311G(d,p) and TZVP are used for all other atoms. Moreover, the solvent effect is evaluated by the SMD<sup>3</sup> model with the experimental methanol solvent. According to the calculated results in Table S4, it is noted that the effect of basis sets is not obvious, and the solvent-phase geometries could not coincide exactly with the crystal structure owing to the neglect of crystal packing effects and unattainable low-temperature conditions. Overall, the PBE1PBE-optimized structures show better agreement with the experimental data, compared to other methods. In consideration of computational costs, the PBE1PBE functional and the 6-311G(d,p) basis set have been used thoroughly here.

### **Confirmation of Spin Multiplicity for the High-Spin State**

Due to the uncertainty of spin multiplicity for the high-spin state, the five possible structures with different spin multiplicities have been optimized at the PBE1PBE/6-311G(d,p) level, and the solvent effect was considered in calculation. Comparing the experimental and optimized average bond lengths of metal-ligand (Fe-N) and metal-metal (Fe-Fe) bonds, we note that the bond distances increase with the spin density, and when the spin multiplicity is set to 9, the corresponding optimized bond lengths match the crystal structure very well, suggesting that the high-spin state observed in experiment should have eight identical spin electrons ( $S = 4$ ).

### **Electronic Absorption Spectrum**

Herein TD-DFT calculations with the PBE1PBE functional are used for determination of the

electronic excitation energies and corresponding oscillator strengths. The solvent effect is taken into account by the SMD model in all the calculations. Since the excitation process is extremely faster than the movement of solvent molecules, the linear-response calculations with non-equilibrium solvation are performed to obtain the vertical excitation energies at the  $S_0$  structure. The calculated excitation energies and oscillation strengths are compiled into Table S3, and the related absorption spectra and molecular orbitals for the  $S_0 \rightarrow S_1$  transitions are displayed in Figures S4-S8. Calculations indicate that the absorption spectrum is in good agreement with the experimental observation for the high-spin state. Accordingly, the absorption at 288 nm is mainly contributed by the HOMO-LUMO  $^1(\pi\pi^*)$  excitation, and the electronic transition at 341 nm is derived from  $\pi(\text{SCN})$  to the  $\pi^*(\text{pnm})$  (LLCT).

## 4. Additional Tables

**Table S1.** Elemental analyses.

|          | Elemental analysis (%) |       |      |       |
|----------|------------------------|-------|------|-------|
|          | N                      | C     | H    | S     |
| <b>1</b> | 27.90                  | 48.82 | 3.35 | 10.64 |
| ppm      | 32.53                  | 62.77 | 4.68 |       |

**Table S2.** Crystal data and structure refinement for **1** at 85, 100 and 230 K.

| <i>T</i> / K                                          | 85                                                                                            | 100                                                 | 230                                                 |
|-------------------------------------------------------|-----------------------------------------------------------------------------------------------|-----------------------------------------------------|-----------------------------------------------------|
| empirical formula                                     | C <sub>53</sub> H <sub>56</sub> Fe <sub>2</sub> N <sub>24</sub> O <sub>4</sub> S <sub>4</sub> |                                                     |                                                     |
| Fw                                                    | 1333.16                                                                                       |                                                     |                                                     |
| crystal system                                        | triclinic                                                                                     |                                                     |                                                     |
| space group                                           | <i>P</i> -1                                                                                   |                                                     |                                                     |
| <i>a</i> / Å                                          | 12.2513(4)                                                                                    | 12.2420(4)                                          | 12.3866(4)                                          |
| <i>b</i> / Å                                          | 13.8462(4)                                                                                    | 13.8866(4)                                          | 14.0248(6)                                          |
| <i>c</i> / Å                                          | 21.0574(5)                                                                                    | 21.0235(6)                                          | 21.2733(6)                                          |
| $\alpha$ / °                                          | 104.407(3)                                                                                    | 104.649(2)                                          | 105.519(3)                                          |
| $\beta$ / °                                           | 94.583(2)                                                                                     | 94.761(3)                                           | 94.916(2)                                           |
| $\gamma$ / °                                          | 108.383(3)                                                                                    | 108.177(3)                                          | 108.160(3)                                          |
| Volume / Å <sup>3</sup>                               | 3234.07(18)                                                                                   | 3233.91(18)                                         | 3325.3(2)                                           |
| <i>Z</i>                                              | 2                                                                                             | 2                                                   | 2                                                   |
| $\rho_{\text{calc}}$ / g cm <sup>-3</sup>             | 1.237                                                                                         | 1.237                                               | 1.203                                               |
| $\mu$ / mm <sup>-1</sup>                              | 5.223                                                                                         | 5.224                                               | 5.080                                               |
| <i>F</i> (000)                                        | 1236.0                                                                                        | 1236.0                                              | 1236.0                                              |
| Crystal size / mm <sup>3</sup>                        | 0.20 × 0.15 × 0.10                                                                            |                                                     |                                                     |
| Radiation                                             | CuK $\alpha$ ( $\lambda$ =<br>1.54178)                                                        | CuK $\alpha$ ( $\lambda$ =<br>1.54178)              | CuK $\alpha$ ( $\lambda$ = 1.54178)                 |
| 2 $\Theta$ range for data collection/°                | 7.028 to 131.096                                                                              | 7.1 to 147.278                                      | 6.098 to 131.79                                     |
| Reflections collected                                 | 19121                                                                                         | 21767                                               | 20713                                               |
| unique                                                | R <sub>int</sub> = 0.0377                                                                     | R <sub>int</sub> = 0.0489                           | R <sub>int</sub> = 0.0434                           |
| Goodness-of-fit on F <sup>2</sup>                     | 1.091                                                                                         | 1.060                                               | 1.118                                               |
| Final R indexes [ <i>I</i> ≥ 2 $\sigma$ ( <i>I</i> )] | R <sub>1</sub> = 0.0717<br>wR <sub>2</sub> = 0.1956                                           | R <sub>1</sub> = 0.0819<br>wR <sub>2</sub> = 0.2174 | R <sub>1</sub> = 0.0662<br>wR <sub>2</sub> = 0.1698 |
| Final R indexes [all data]                            | R <sub>1</sub> = 0.0851<br>wR <sub>2</sub> = 0.2069                                           | R <sub>1</sub> = 0.1026<br>wR <sub>2</sub> = 0.2283 | R <sub>1</sub> = 0.0927<br>wR <sub>2</sub> = 0.1770 |
| Largest diff. peak/hole / e Å <sup>-3</sup>           | 2.46/-1.74                                                                                    | 1.91/-0.76                                          | 0.70/-0.52                                          |



**Table S3.** Comparative analysis of selected bond lengths [ $\text{\AA}$ ] between experimental data and theoretical calculation of **1**.

| $T/\text{K}$   | Experimental data |          |          | Theoretical calculations |          |
|----------------|-------------------|----------|----------|--------------------------|----------|
|                | 85                | 100      | 230      | LS                       | HS       |
| Fe1-NCS        | 2.022(5)          | 2.047(6) | 2.116(5) | 1.955(4)                 | 2.117(5) |
| Fe1-pnm        | 2.068(4)          | 2.093(5) | 2.196(5) | 1.978(4)                 | 2.224(4) |
| Fe2-NCS        | 2.021(5)          | 2.032(5) | 2.114(5) | 1.954(5)                 | 2.118(4) |
| Fe2-pnm        | 2.062(4)          | 2.075(4) | 2.187(5) | 1.978(4)                 | 2.224(4) |
| Fe $\cdots$ Fe | 3.777             | 3.804    | 3.968    | 3.623                    | 3.997    |

**Table S4.** Selected metal-ligand and metal-metal bond distances in the optimized geometries of low-spin state of **1** by different DFT approaches and the experiment (The temperature is set to 100 K).

| Functional             | Average bond length ( $\text{\AA}$ ) |                                         |                      |                                         |
|------------------------|--------------------------------------|-----------------------------------------|----------------------|-----------------------------------------|
|                        | Fe-N1 <sup>a</sup>                   | Fe-N2 <sup>b</sup>                      | Fe-N3 <sup>c</sup>   | Fe1-Fe2                                 |
|                        | 6-311G(d,p)/TZVP<br>P                | 6-311G(d,p)/TZVP                        | 6-311G(d,p)/TZVP     | 6-311G(d,p)/TZVP                        |
| <b>Local</b>           |                                      |                                         |                      |                                         |
| BP86                   | 1.929 / 1.927                        | 1.968 / 1.973                           | 1.948 / 1.951        | 3.615 / 3.619                           |
| PW91                   | 1.923 / 1.924                        | 1.962 / 1.970                           | 1.943 / 1.949        | 3.602 / 3.610                           |
| PBE                    | 1.923 / 1.925                        | 1.964 / 1.965                           | 1.945 / 1.952        | 3.604 / 3.611                           |
| M11-L                  | 1.9151 / 1.916                       | 1.942 / 1.945                           | 1.927 / 1.929        | 3.540 / 3.544                           |
| <b>Hybrid</b>          |                                      |                                         |                      |                                         |
| B3LYP                  | 1.982 / 1.984                        | 2.020 / 2.027                           | 2.006 / 2.014        | 3.678 / 3.749                           |
| PBE1PBE                | <b>1.954 / 1.956</b>                 | <b>1.987 / 1.992</b>                    | <b>1.975 / 1.981</b> | <b>3.626 / 3.623</b>                    |
| M06                    | 1.949 / 1.951                        | 1.984 / 1.988                           | 1.976 / 1.978        | 3.620 / 3.625                           |
| <b>Range-separated</b> |                                      |                                         |                      |                                         |
| HSEH1PBE               | 1.955 / 1.957                        | 1.988 / 1.993                           | 1.976 / 1.982        | 3.625 / 3.633                           |
| $\omega$ B97X          | 1.998 / 1.990                        | 2.022 / 2.018                           | 2.019 / 2.009        | 3.672 / 3.661                           |
| <b>Exp.</b>            |                                      | 1.983 <sup>d</sup> / 2.050 <sup>f</sup> |                      | 3.648 <sup>d</sup> / 3.773 <sup>f</sup> |

N1<sup>a</sup>, N2<sup>b</sup>, N3<sup>c</sup> refer to the ligand (NCS), the mono- and bi-dentate-chelating pnm, respectively. <sup>d</sup>The experimental data at 77K in Reference<sup>4</sup>. <sup>f</sup>The experimental data at 85 K.

**Table S5.** Selected metal-ligand and metal-metal average bond distances in the optimized geometries of different spin states of **1** by PBE1PBE and the available experimental values (The calculated temperature is 300K).

| Spin multiplicity | Average bond length (Å)                           |                    |                                         | Spin density                                                                          |
|-------------------|---------------------------------------------------|--------------------|-----------------------------------------|---------------------------------------------------------------------------------------|
|                   | Fe1-N <sup>a</sup>                                | Fe2-N <sup>b</sup> | Fe1-Fe2                                 |                                                                                       |
| 1                 | 1.970                                             | 1.970              | 3.623                                   | 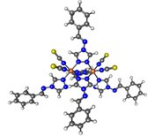   |
| 3                 | 1.975                                             | 2.079              | 3.727                                   |    |
| 5                 | 1.978                                             | 2.178              | 3.833                                   |    |
| 7                 | 2.092                                             | 2.184              | 3.922                                   |  |
| 9                 | 2.189                                             | 2.189              | 3.997                                   |  |
| Exp. (HS)         | 2.180 <sup>c</sup> / (2.153 & 2.156) <sup>d</sup> |                    | 3.966 <sup>c</sup> / 3.938 <sup>d</sup> |                                                                                       |

Fe1-N<sup>a</sup> and Fe2-N<sup>b</sup> refer to the average bond length between Fe center with N atoms of ligands. <sup>c</sup>Reference<sup>4</sup>. <sup>d</sup> The experimental data at 230 K.

**Table S6.** The predicted excitation energies ( $E/\lambda$ ), corresponding oscillator strengths ( $f$ ), and assignment for the lowest 60 transitions of **1** in the high-spin and low-spin states by TD-PBE1PBE (the LanL2DZ pseudo-potentials for Fe and S and the 6-311G(d,p) basis set for all other atoms).

| High-spin |                |   |                     | Low-spin |                |   |                     |
|-----------|----------------|---|---------------------|----------|----------------|---|---------------------|
| E (eV)    | $\lambda$ (nm) | f | Main configurations | E (eV)   | $\lambda$ (nm) | f | Main configurations |

|        |         |        |                                       |        |        |        |                                    |
|--------|---------|--------|---------------------------------------|--------|--------|--------|------------------------------------|
| 0.3183 | 3894.68 | 0.0000 |                                       | 2.2085 | 561.39 | 0.0000 |                                    |
| 0.3230 | 3839.05 | 0.0001 |                                       | 2.2298 | 556.02 | 0.0000 |                                    |
| 0.4186 | 2962.01 | 0.0000 |                                       | 2.2611 | 548.34 | 0.0001 |                                    |
| 0.4258 | 2911.46 | 0.0000 |                                       | 2.2731 | 545.45 | 0.0000 |                                    |
| 1.6585 | 747.56  | 0.0000 |                                       | 2.2922 | 540.91 | 0.0003 |                                    |
| 1.6722 | 741.43  | 0.0000 |                                       | 2.3028 | 538.40 | 0.0001 |                                    |
| 1.8043 | 687.16  | 0.0000 |                                       | 3.1307 | 396.03 | 0.0190 |                                    |
| 1.8114 | 684.45  | 0.0000 |                                       | 3.1349 | 395.49 | 0.0072 |                                    |
| 2.7874 | 444.80  | 0.0000 |                                       | 3.1590 | 392.47 | 0.0224 | H → L+1 (0.31)<br>H → L (0.27)     |
| 2.7920 | 444.07  | 0.0000 |                                       | 3.1764 | 390.32 | 0.0036 |                                    |
| 2.7979 | 439.67  | 0.0000 |                                       | 3.1959 | 387.95 | 0.0026 |                                    |
| 2.8200 | 438.90  | 0.0000 |                                       | 3.2055 | 386.78 | 0.0037 |                                    |
| 2.8249 | 385.40  | 0.0006 |                                       | 3.2149 | 385.65 | 0.0033 |                                    |
| 3.2170 | 384.36  | 0.0006 |                                       | 3.2236 | 384.61 | 0.0303 | H-2 → L (0.34)<br>H-1 → L+1 (0.24) |
| 3.2257 | 380.93  | 0.0027 | 274B→277B (0.64)<br>275B→ 277B (0.38) | 3.2311 | 383.72 | 0.0098 |                                    |
| 3.2548 | 380.84  | 0.0021 | 274B→277B (0.48)<br>275B→ 278B (0.29) | 3.2390 | 382.78 | 0.0065 |                                    |
| 3.2555 | 376.41  | 0.0006 |                                       | 3.2485 | 381.66 | 0.0121 |                                    |
| 3.2939 | 375.92  | 0.0004 |                                       | 3.2586 | 380.49 | 0.0090 |                                    |
| 3.2981 | 372.83  | 0.0023 | 274B→278B (0.82)                      | 3.2627 | 380.00 | 0.0013 |                                    |
| 3.3255 | 370.72  | 0.0009 |                                       | 3.2774 | 378.30 | 0.0135 |                                    |
| 3.3444 | 351.93  | 0.0000 |                                       | 3.2798 | 378.02 | 0.0033 |                                    |
| 3.5230 | 350.68  | 0.0000 |                                       | 3.2858 | 377.33 | 0.0152 |                                    |
| 3.5356 | 345.85  | 0.0002 |                                       | 3.3027 | 375.40 | 0.0137 |                                    |
| 3.5849 | 342.26  | 0.0003 |                                       | 3.3172 | 373.76 | 0.0060 |                                    |
| 3.6225 | 342.07  | 0.0002 |                                       | 3.3277 | 372.58 | 0.0013 |                                    |
| 3.6246 | 341.50  | 0.0028 | 273B→276B (0.65)                      | 3.3325 | 372.05 | 0.0054 |                                    |
| 3.6306 | 339.69  | 0.0001 |                                       | 3.3426 | 370.92 | 0.0037 |                                    |
| 3.6499 | 339.39  | 0.0001 |                                       | 3.3509 | 370.00 | 0.0098 |                                    |
| 3.6531 | 338.24  | 0.0006 |                                       | 3.3558 | 369.47 | 0.0008 |                                    |
| 3.6656 | 338.06  | 0.0001 |                                       | 3.3628 | 368.69 | 0.0106 |                                    |
| 3.6675 | 336.53  | 0.0012 |                                       | 3.3701 | 367.89 | 0.0068 |                                    |
| 3.6842 | 336.45  | 0.0001 |                                       | 3.3874 | 366.01 | 0.0122 |                                    |
| 3.6851 | 336.15  | 0.0001 |                                       | 3.3961 | 365.08 | 0.0051 |                                    |
| 3.6883 | 335.56  | 0.0001 |                                       | 3.4150 | 363.06 | 0.0080 |                                    |
| 3.6949 | 335.19  | 0.0002 |                                       | 3.4273 | 361.76 | 0.0079 |                                    |
| 3.6989 | 335.12  | 0.0001 |                                       | 3.4302 | 361.45 | 0.0053 |                                    |

|        |        |        |        |        |        |                                      |
|--------|--------|--------|--------|--------|--------|--------------------------------------|
| 3.6996 | 334.87 | 0.0004 | 3.4782 | 356.46 | 0.0001 |                                      |
| 3.7025 | 334.36 | 0.0001 | 3.4846 | 355.81 | 0.0000 |                                      |
| 3.7082 | 333.86 | 0.0002 | 3.4961 | 354.63 | 0.0000 |                                      |
| 3.7137 | 333.06 | 0.0001 | 3.5158 | 352.65 | 0.0007 |                                      |
| 3.7225 | 332.95 | 0.0001 | 3.5425 | 349.99 | 0.0003 |                                      |
| 3.7238 | 332.33 | 0.0002 | 3.5508 | 349.17 | 0.0032 |                                      |
| 3.7308 | 331.73 | 0.0002 | 3.5585 | 348.42 | 0.0013 |                                      |
| 3.7375 | 331.52 | 0.0006 | 3.5671 | 347.58 | 0.0007 |                                      |
| 3.7398 | 330.67 | 0.0003 | 3.5689 | 347.40 | 0.0008 |                                      |
| 3.7494 | 329.69 | 0.0001 | 3.5774 | 346.57 | 0.0004 |                                      |
| 3.7606 | 329.28 | 0.0001 | 3.6050 | 343.93 | 0.0000 |                                      |
| 3.7653 | 328.57 | 0.0002 | 3.6131 | 343.16 | 0.0003 |                                      |
| 3.7734 | 327.93 | 0.0000 | 3.6239 | 342.12 | 0.0000 |                                      |
| 3.7808 | 327.82 | 0.0008 | 3.6341 | 341.17 | 0.0001 |                                      |
| 3.7821 | 327.54 | 0.0001 | 3.7887 | 327.24 | 0.0001 |                                      |
| 3.7853 | 327.15 | 0.0001 | 3.8066 | 325.71 | 0.0002 |                                      |
| 3.7899 | 326.69 | 0.0002 | 3.9375 | 314.88 | 0.1023 | H-8 → L+1 (0.62)                     |
| 3.7951 | 325.27 | 0.0001 | 3.9502 | 313.86 | 0.0270 |                                      |
| 3.8117 | 325.03 | 0.0007 | 3.9841 | 311.20 | 0.0837 | H-9 → L+1 (0.42)<br>H-8 → L+3 (0.30) |
| 3.8145 | 324.48 | 0.0001 | 3.9929 | 310.51 | 0.0693 |                                      |
| 3.8210 | 324.20 | 0.0004 | 4.0206 | 308.37 | 0.0180 |                                      |
| 3.8243 | 324.12 | 0.0013 | 4.0305 | 307.62 | 0.0557 |                                      |
| 3.8253 | 323.57 | 0.0003 | 4.0533 | 305.89 | 0.0360 |                                      |
| 3.8317 | 326.69 | 0.0002 | 4.0719 | 304.48 | 0.0087 |                                      |

**Table S7.** Optimized geometries of **1** in the high-spin state.

| HS   |       |             |             |             |  |
|------|-------|-------------|-------------|-------------|--|
| Atom | Elem. | X coord.    | Y coord.    | Z coord.    |  |
| 1    | C     | -4.52491300 | -1.21561900 | 0.01884500  |  |
| 2    | H     | -5.19944400 | -0.45073600 | -0.33192700 |  |
| 3    | C     | -3.73255500 | -3.10663600 | 0.70876400  |  |
| 4    | H     | -3.70374800 | -4.13252300 | 1.04228300  |  |
| 5    | C     | -7.13886600 | -2.33783000 | 0.58429500  |  |
| 6    | H     | -7.05332600 | -1.25817700 | 0.72299200  |  |
| 7    | C     | -8.48552900 | -2.89081400 | 0.59259400  |  |
| 8    | C     | -8.73575300 | -4.25111700 | 0.36798700  |  |
| 9    | H     | -7.90661600 | -4.92210000 | 0.17126400  |  |

|    |   |             |             |             |
|----|---|-------------|-------------|-------------|
| 10 | C | 10.03541600 | -4.72763000 | 0.39326400  |
| 11 | H | 10.22768800 | -5.78103500 | 0.21751800  |
| 12 | C | 11.09756200 | -3.85728900 | 0.63940800  |
| 13 | H | 12.11451500 | -4.23613200 | 0.65610700  |
| 14 | C | 10.85634700 | -2.50591600 | 0.85951200  |
| 15 | H | 11.68193200 | -1.82799800 | 1.04916500  |
| 16 | C | -9.55456100 | -2.02262100 | 0.83498300  |
| 17 | H | -9.35859600 | -0.96818400 | 1.00547200  |
| 18 | C | 0.96199200  | 3.67650900  | -1.22749100 |
| 19 | H | 1.98074200  | 4.01706800  | -1.32241100 |
| 20 | C | -1.20176300 | 3.62667200  | -1.26245800 |
| 21 | H | -2.22739900 | 3.94525600  | -1.36405300 |
| 22 | C | 0.67156400  | 6.54748600  | -1.44371200 |
| 23 | H | 1.50119600  | 6.20971400  | -0.81849300 |
| 24 | C | 0.67231800  | 7.95279300  | -1.81981300 |
| 25 | C | -0.30608400 | 8.50309600  | -2.65852000 |
| 26 | H | -1.09023400 | 7.86809700  | -3.05616300 |
| 27 | C | -0.26394700 | 9.84987300  | -2.97613500 |
| 28 | H | -1.02172800 | 10.27507400 | -3.62611600 |
| 29 | C | 0.75074400  | 10.66010700 | -2.46602700 |
| 30 | H | 0.77870000  | 11.71508300 | -2.71970400 |
| 31 | C | 1.72682200  | 10.11927700 | -1.63677400 |
| 32 | H | 2.51737100  | 10.74838400 | -1.24131300 |
| 33 | C | 1.68955600  | 8.76895700  | -1.31511800 |
| 34 | H | 2.44807400  | 8.33812900  | -0.66814200 |
| 35 | C | 1.08870800  | -1.52717600 | -2.44573500 |
| 36 | H | 2.11934000  | -1.73823300 | -2.67918500 |
| 37 | C | -1.07545800 | -1.55116000 | -2.45689200 |
| 38 | H | -2.09009600 | -1.81886300 | -2.70619000 |
| 39 | C | 0.92534600  | -3.84928600 | -4.18475100 |
| 40 | H | 1.87086100  | -3.71598300 | -3.65598500 |
| 41 | C | 0.89312500  | -4.89943300 | -5.19227200 |
| 42 | C | -0.25322400 | -5.17423600 | -5.94991700 |
| 43 | H | -1.15348500 | -4.59101000 | -5.79009800 |
| 44 | C | -0.22924100 | -6.18419000 | -6.89642800 |
| 45 | H | -1.11765000 | -6.39527700 | -7.48271600 |
| 46 | C | 0.93292200  | -6.92889500 | -7.09947300 |
| 47 | H | 0.94575000  | -7.71792700 | -7.84480700 |
| 48 | C | 2.07367300  | -6.66107800 | -6.35142300 |
| 49 | H | 2.97838600  | -7.23869000 | -6.50956500 |

|    |   |             |             |             |
|----|---|-------------|-------------|-------------|
| 50 | C | 2.05502000  | -5.64931200 | -5.40025100 |
| 51 | H | 2.94276200  | -5.43352000 | -4.81315900 |
| 52 | C | 3.93914300  | -2.84486300 | 0.75195600  |
| 53 | H | 3.96432500  | -3.89627400 | 0.98950100  |
| 54 | C | 4.57076000  | -0.81325900 | 0.35586000  |
| 55 | H | 5.19776600  | 0.05757000  | 0.24552600  |
| 56 | C | 6.68157600  | -3.29926800 | 1.62640400  |
| 57 | H | 5.93794000  | -4.00515000 | 2.00065400  |
| 58 | C | 8.07334900  | -3.61653000 | 1.91622600  |
| 59 | C | 9.13172400  | -2.80624100 | 1.48422800  |
| 60 | H | 8.92120400  | -1.91350400 | 0.90537100  |
| 61 | C | 10.43627400 | -3.14849500 | 1.79739400  |
| 62 | H | 11.25431600 | -2.51918300 | 1.46210900  |
| 63 | C | 10.70173500 | -4.29877800 | 2.54064400  |
| 64 | H | 11.72661100 | -4.56167600 | 2.78272200  |
| 65 | C | 9.65660300  | -5.10863600 | 2.96995700  |
| 66 | H | 9.86148000  | -6.00433400 | 3.54706200  |
| 67 | C | 8.34617200  | -4.76959200 | 2.65884600  |
| 68 | H | 7.52489400  | -5.39749900 | 2.99186800  |
| 69 | C | -1.07354500 | 0.06777800  | 2.54756600  |
| 70 | H | -2.09478800 | -0.03577500 | 2.87763200  |
| 71 | C | 1.09019100  | 0.09682700  | 2.53304400  |
| 72 | H | 2.11226200  | 0.04539500  | 2.87349000  |
| 73 | C | -0.82283900 | -0.00228500 | 5.43425400  |
| 74 | H | -1.68168500 | 0.55470100  | 5.05359200  |
| 75 | C | -0.82144200 | -0.29946200 | 6.85837000  |
| 76 | C | 0.20496000  | -1.03299600 | 7.46832100  |
| 77 | H | 1.02831000  | -1.40410200 | 6.86778500  |
| 78 | C | 0.16087900  | -1.28008300 | 8.82967200  |
| 79 | H | 0.95622200  | -1.84774300 | 9.30152000  |
| 80 | C | -0.90328100 | -0.80302900 | 9.59541800  |
| 81 | H | -0.93252200 | -1.00127200 | 10.66217800 |
| 82 | C | -1.92616700 | -0.07699800 | 8.99585400  |
| 83 | H | -2.75438300 | 0.29328100  | 9.59087700  |
| 84 | C | -1.88689000 | 0.17408900  | 7.63065600  |
| 85 | H | -2.68158300 | 0.74023900  | 7.15360900  |
| 86 | C | -3.80522800 | 2.25947900  | 1.81972800  |
| 87 | C | -3.89618800 | 1.05828800  | -3.10791700 |
| 88 | C | 3.72572500  | 1.23501800  | -3.17862500 |
| 89 | C | 3.51576300  | 3.07049900  | 1.31105700  |

|     |    |             |             |             |
|-----|----|-------------|-------------|-------------|
| 90  | N  | -3.22356900 | -1.11534500 | 0.10691200  |
| 91  | N  | -2.71829200 | -2.30560600 | 0.55028100  |
| 92  | N  | -4.89263800 | -2.46494400 | 0.40137900  |
| 93  | N  | -6.11651100 | -3.09190500 | 0.43437700  |
| 94  | N  | 0.58168500  | 2.46325700  | -0.93060300 |
| 95  | N  | -0.77959800 | 2.43256400  | -0.94439700 |
| 96  | N  | -0.13856000 | 4.44600800  | -1.43594100 |
| 97  | N  | -0.26642300 | 5.76246800  | -1.82105800 |
| 98  | N  | 0.66915600  | -0.61140000 | -1.61556300 |
| 99  | N  | -0.69174100 | -0.62853000 | -1.61798500 |
| 100 | N  | 0.01164400  | -2.15133200 | -2.99563200 |
| 101 | N  | -0.11090300 | -3.13931200 | -3.94417500 |
| 102 | N  | 2.87963800  | -2.16977200 | 0.40941500  |
| 103 | N  | 3.27998200  | -0.88496800 | 0.16611000  |
| 104 | N  | 5.03492100  | -2.02441600 | 0.73699700  |
| 105 | N  | 6.36969600  | -2.24115100 | 0.98001400  |
| 106 | N  | -0.68149200 | 0.31019400  | 1.32571500  |
| 107 | N  | 0.67884200  | 0.33638600  | 1.31707200  |
| 108 | N  | 0.01967600  | -0.06446300 | 3.34407100  |
| 109 | N  | 0.14444800  | -0.37037400 | 4.68126400  |
| 110 | N  | -3.22217600 | 1.84620400  | 0.88601900  |
| 111 | N  | -3.22308800 | 0.95151600  | -2.15014100 |
| 112 | N  | 3.07760700  | 1.10404000  | -2.20639700 |
| 113 | N  | 3.08777700  | 2.12655600  | 0.75628100  |
| 114 | S  | -4.61504300 | 2.83430900  | 3.12827200  |
| 115 | S  | -4.83594100 | 1.21168000  | -4.44649900 |
| 116 | S  | 4.63358300  | 1.41789800  | -4.53381500 |
| 117 | S  | 4.10996100  | 4.39264400  | 2.08679900  |
| 118 | Fe | -2.03343000 | 0.67984800  | -0.42199800 |
| 119 | Fe | 1.96236600  | 0.77918000  | -0.44979900 |

**Table S8.** Optimized geometries of **1** in the low-spin state.

| Atom | Elem. | X coord.   | Y coord.    | Z coord.   |
|------|-------|------------|-------------|------------|
| 1    | C     | 4.18538300 | -1.26216600 | 0.41668700 |
| 2    | H     | 4.88248800 | -0.46169000 | 0.59879900 |
| 3    | C     | 3.31919900 | -3.22714800 | 0.14450000 |
| 4    | H     | 3.24850600 | -4.29877600 | 0.04036100 |
| 5    | C     | 6.75974800 | -2.57406100 | 0.20570500 |

---

|    |   |             |             |             |
|----|---|-------------|-------------|-------------|
| 6  | H | 6.73962400  | -1.52067600 | -0.08033500 |
| 7  | C | 8.07467700  | -3.18982400 | 0.31482000  |
| 8  | C | 8.24425900  | -4.53332300 | 0.67524600  |
| 9  | H | 7.37412600  | -5.14455900 | 0.88864300  |
| 10 | C | 9.51741400  | -5.07103100 | 0.75702300  |
| 11 | H | 9.64689700  | -6.11185100 | 1.03546000  |
| 12 | C | 10.63312000 | -4.27889200 | 0.48511500  |
| 13 | H | 11.62874900 | -4.70568600 | 0.55305000  |
| 14 | C | 10.47207400 | -2.94476100 | 0.12916700  |
| 15 | H | 11.33903800 | -2.32757400 | -0.08210900 |
| 16 | C | 9.19696500  | -2.40104700 | 0.04355900  |
| 17 | H | 9.06290500  | -1.35946200 | -0.23341500 |
| 18 | C | -0.84357700 | 3.60831000  | 0.40184900  |
| 19 | H | -1.84852000 | 3.99407900  | 0.37604800  |
| 20 | C | 1.31216000  | 3.46078700  | 0.59238400  |
| 21 | H | 2.34581400  | 3.73709200  | 0.72076200  |
| 22 | C | -0.43458400 | 6.47148800  | 0.34804700  |
| 23 | H | -1.31352700 | 6.10921300  | -0.18891400 |
| 24 | C | -0.34471800 | 7.91041800  | 0.54482900  |
| 25 | C | 0.70843200  | 8.50467400  | 1.25291000  |
| 26 | H | 1.48751500  | 7.88152100  | 1.67835900  |
| 27 | C | 0.74610700  | 9.87980300  | 1.40797800  |
| 28 | H | 1.56158500  | 10.33890900 | 1.95727200  |
| 29 | C | -0.26191700 | 10.67568000 | 0.86325200  |
| 30 | H | -0.22800900 | 11.75307400 | 0.99052500  |
| 31 | C | -1.31034900 | 10.09215600 | 0.16101500  |
| 32 | H | -2.09515000 | 10.71041300 | -0.26206600 |
| 33 | C | -1.35322100 | 8.71322800  | 0.00244800  |
| 34 | H | -2.16918100 | 8.24924800  | -0.54374100 |
| 35 | C | -1.34268700 | -0.83451600 | 2.44618100  |
| 36 | H | -2.39782800 | -0.91703400 | 2.64429700  |
| 37 | C | 0.81206800  | -0.96719900 | 2.64437900  |
| 38 | H | 1.78514800  | -1.21357300 | 3.03553200  |
| 39 | C | -1.44701900 | -2.71384100 | 4.65084500  |
| 40 | H | -2.30590100 | -2.72237500 | 3.97717800  |
| 41 | C | -1.57815800 | -3.48617100 | 5.87710800  |
| 42 | C | -0.56491700 | -3.53180000 | 6.84399400  |
| 43 | H | 0.35025700  | -2.97117600 | 6.68744200  |
| 44 | C | -0.73947500 | -4.28673800 | 7.99122900  |
| 45 | H | 0.04509200  | -4.31952300 | 8.74021300  |

---



---

|    |   |             |             |             |
|----|---|-------------|-------------|-------------|
| 46 | C | -1.92127300 | -5.00152500 | 8.18827000  |
| 47 | H | -2.05323800 | -5.58967000 | 9.09090900  |
| 48 | C | -2.93048200 | -4.96020900 | 7.23292800  |
| 49 | H | -3.85009500 | -5.51523400 | 7.38606700  |
| 50 | C | -2.76102800 | -4.20394300 | 6.08065600  |
| 51 | H | -3.54487100 | -4.16569300 | 5.32985400  |
| 52 | C | -3.70020700 | -2.70877500 | -0.50849300 |
| 53 | H | -3.75347800 | -3.78347100 | -0.57855000 |
| 54 | C | -4.28234500 | -0.62535000 | -0.41293600 |
| 55 | H | -4.88567900 | 0.26764200  | -0.42250300 |
| 56 | C | -6.45197400 | -3.21214100 | -1.30413200 |
| 57 | H | -5.71720400 | -3.94794200 | -1.63611500 |
| 58 | C | -7.85176100 | -3.55641300 | -1.51049300 |
| 59 | C | -8.89634500 | -2.71187500 | -1.11178900 |
| 60 | H | -8.66794300 | -1.77101600 | -0.62295000 |
| 61 | C | 10.21027800 | -3.08195600 | -1.34297500 |
| 62 | H | 11.01778400 | -2.42603500 | -1.03426400 |
| 63 | C | 10.49882700 | -4.29467100 | -1.96919200 |
| 64 | H | 11.53107100 | -4.57909400 | -2.14712200 |
| 65 | C | -9.46731500 | -5.13890200 | -2.36409300 |
| 66 | H | -9.69002700 | -6.08268700 | -2.85087700 |
| 67 | C | -8.14743900 | -4.77205200 | -2.13533200 |
| 68 | H | -7.33622000 | -5.42620300 | -2.44141800 |
| 69 | C | 1.28796100  | -0.48258200 | -2.34581800 |
| 70 | H | 2.32294500  | -0.69231500 | -2.55696200 |
| 71 | C | -0.86835000 | -0.35222600 | -2.52259400 |
| 72 | H | -1.86222800 | -0.41464700 | -2.93357900 |
| 73 | C | 1.26065300  | -1.11508000 | -5.16603500 |
| 74 | H | 2.13495100  | -0.56458000 | -4.81289300 |
| 75 | C | 1.34590900  | -1.67919300 | -6.50414600 |
| 76 | C | 0.31065000  | -2.43976600 | -7.06403100 |
| 77 | H | -0.58888000 | -2.62784400 | -6.48802300 |
| 78 | C | 0.44269100  | -2.94691000 | -8.34534500 |
| 79 | H | -0.35977600 | -3.53514300 | -8.77831200 |
| 80 | C | 1.60398100  | -2.70563000 | -9.07984600 |
| 81 | H | 1.70138000  | -3.10698100 | 10.08363300 |
| 82 | C | 2.63596600  | -1.95445600 | -8.52889700 |
| 83 | H | 3.53970700  | -1.76704600 | -9.09922100 |
| 84 | C | 2.50859600  | -1.44256800 | -7.24436800 |
| 85 | H | 3.30997400  | -0.85431400 | -6.80710800 |

---

---

|     |    |             |             |             |
|-----|----|-------------|-------------|-------------|
| 86  | C  | 3.95337400  | 1.84340400  | -1.58130000 |
| 87  | C  | 3.52471500  | 1.50815600  | 2.81677400  |
| 88  | C  | -3.69216700 | 2.01106400  | 2.16681500  |
| 89  | C  | -3.22130700 | 2.49676300  | -2.13797100 |
| 90  | N  | 2.88839200  | -1.13942600 | 0.28831700  |
| 91  | N  | 2.33609300  | -2.37351100 | 0.11044700  |
| 92  | N  | 4.50138500  | -2.57940600 | 0.32227900  |
| 93  | N  | 5.69615500  | -3.24987300 | 0.42511800  |
| 94  | N  | -0.50949400 | 2.34828300  | 0.30660800  |
| 95  | N  | 0.83939100  | 2.25516100  | 0.41977700  |
| 96  | N  | 0.28632300  | 4.34302100  | 0.57484900  |
| 97  | N  | 0.48196400  | 5.68920000  | 0.77841900  |
| 98  | N  | -0.79947400 | -0.18543200 | 1.44973000  |
| 99  | N  | 0.54987200  | -0.27334600 | 1.56906800  |
| 100 | N  | -0.35062900 | -1.35189200 | 3.21768000  |
| 101 | N  | -0.37118000 | -2.07332400 | 4.38808800  |
| 102 | N  | -2.61808400 | -2.01534300 | -0.29289900 |
| 103 | N  | -2.98810200 | -0.70380900 | -0.24161500 |
| 104 | N  | -4.77577500 | -1.87032800 | -0.59765700 |
| 105 | N  | -6.11971700 | -2.09705400 | -0.77357600 |
| 106 | N  | 0.81513800  | 0.00032100  | -1.22625900 |
| 107 | N  | -0.53387900 | 0.08927600  | -1.33865200 |
| 108 | N  | 0.25036700  | -0.71087500 | -3.19139400 |
| 109 | N  | 0.20573600  | -1.25402800 | -4.45495900 |
| 110 | N  | 3.16686000  | 1.38005000  | -0.84769200 |
| 111 | N  | 2.90670500  | 1.12658700  | 1.89810900  |
| 112 | N  | -2.95038800 | 1.54925400  | 1.38705200  |
| 113 | N  | -2.67455400 | 1.83164600  | -1.34432900 |
| 114 | S  | 5.06037800  | 2.48926400  | -2.62103900 |
| 115 | S  | 4.38954400  | 2.04776700  | 4.11445200  |
| 116 | S  | -4.73755800 | 2.66034500  | 3.26613200  |
| 117 | S  | -3.98939100 | 3.43325000  | -3.25878400 |
| 118 | Fe | 1.85977200  | 0.55706200  | 0.35013500  |
| 119 | Fe | -1.74037500 | 0.81691800  | 0.03909700  |

---

## 5. Additional Figures

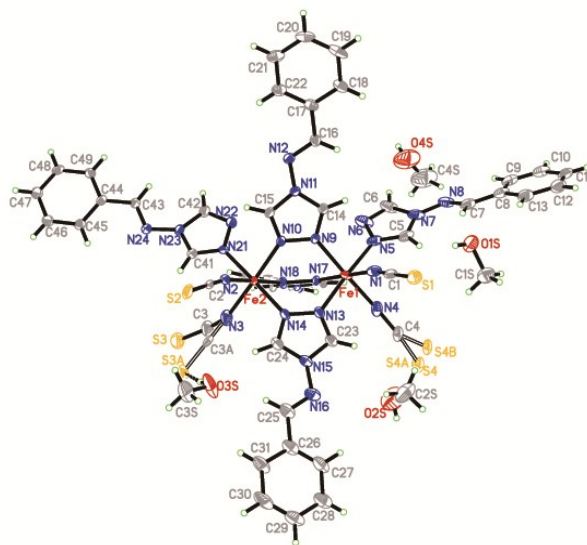

**Figure S1.** ORTEP drawing of the molecular structure of 1, lattice methanol molecules are omitted for clarity.

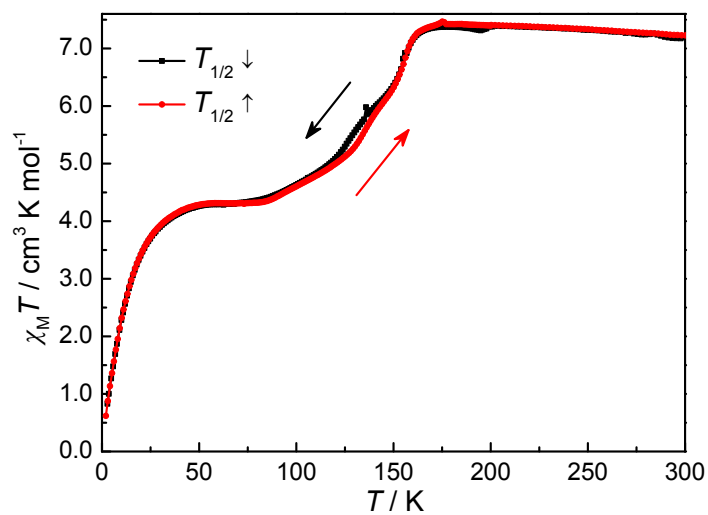

**Figure S2.** Magnetic properties 1 under applied field of 5000 Oe, sweeping rate: 1 K mol<sup>-1</sup>.

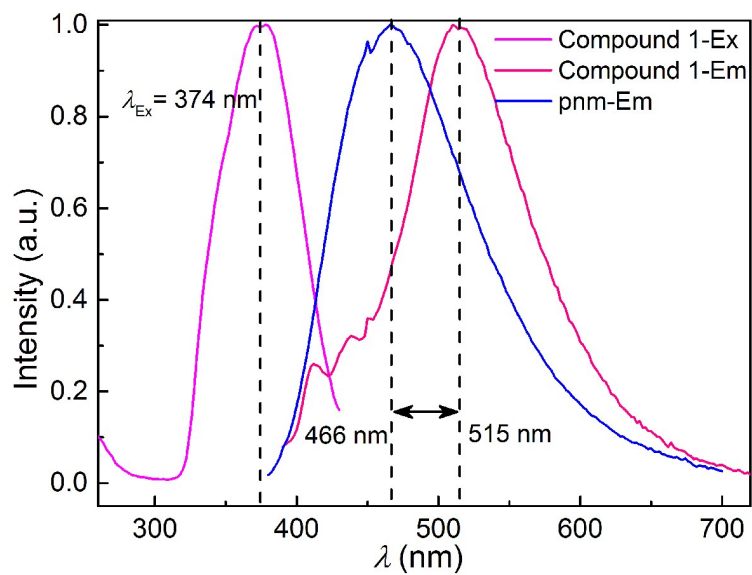

**Figure S3.** Solid-state fluorescence spectra of **1** and pnm at room temperature. Excitation: 347 nm for pnm, 374 nm for **1**. Em: emission.

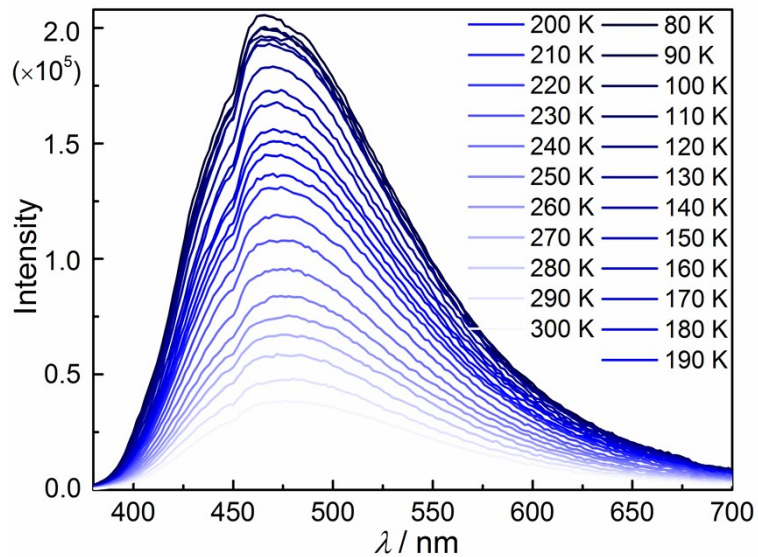

**Figure S4.** Temperature-dependent fluorescent emission spectra of pnm in the solid states.

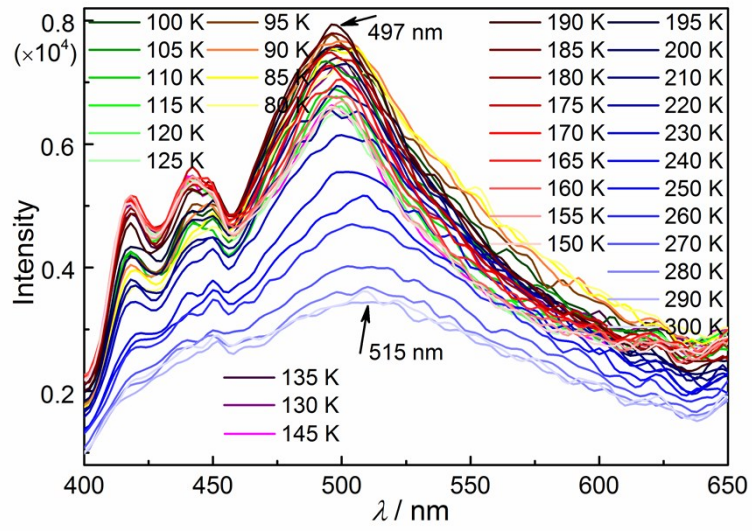

(a)

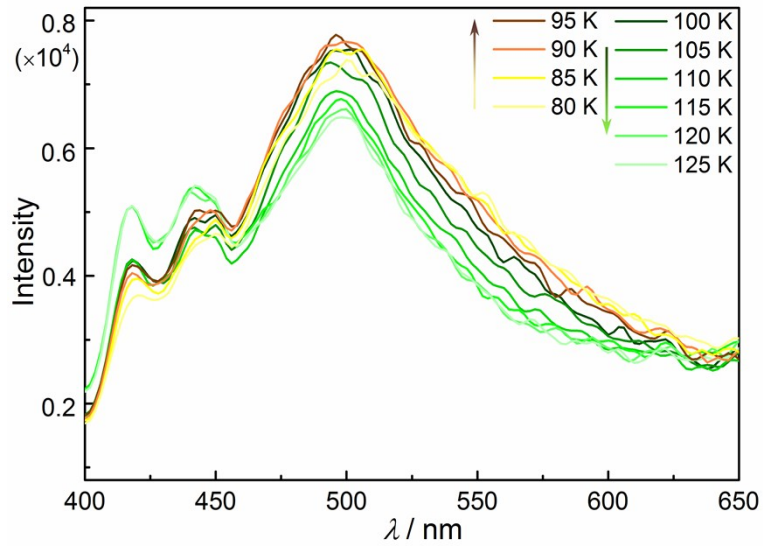

(b)

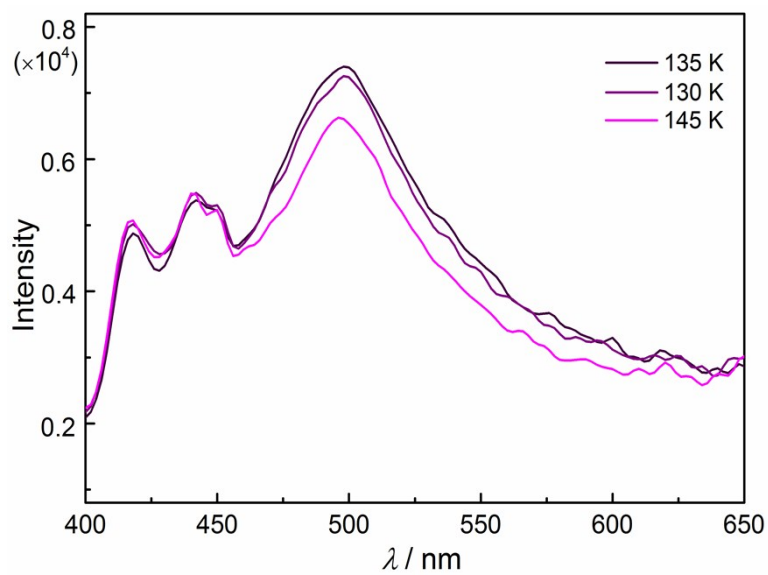

(c)

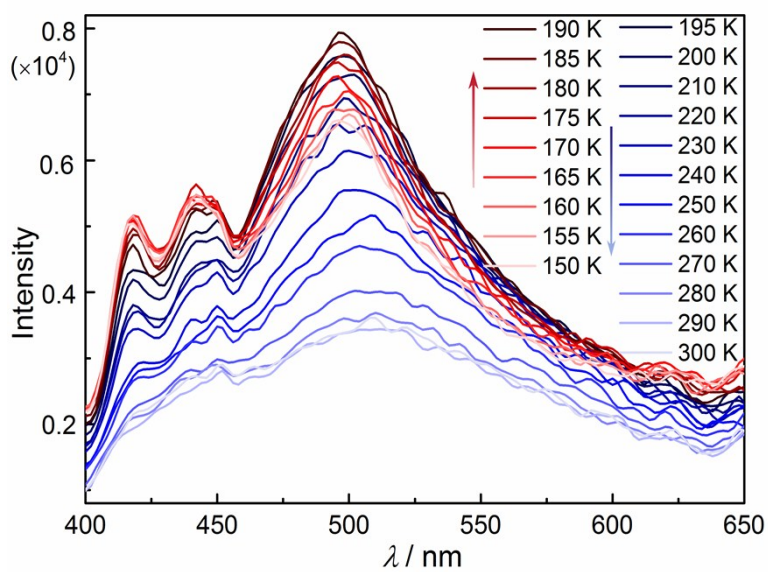

(d)

**Figure S5.** (a) Temperature-dependent fluorescent emission spectra of **1** in the solid states (80-300 K). (b) Temperature-dependent fluorescent emission spectra of **1** in the solid states (80-125 K). The

arrow indicates the trend of emission intensity with increasing temperature. (c) Temperature-dependent fluorescent emission spectra of **1** in the solid states (130-145 K). The arrow indicates the trend of emission intensity with increasing temperature. (d) Temperature-dependent fluorescent emission spectra of **1** in the solid states (150-300 K). The arrow indicates the trend of emission intensity with increasing temperature.

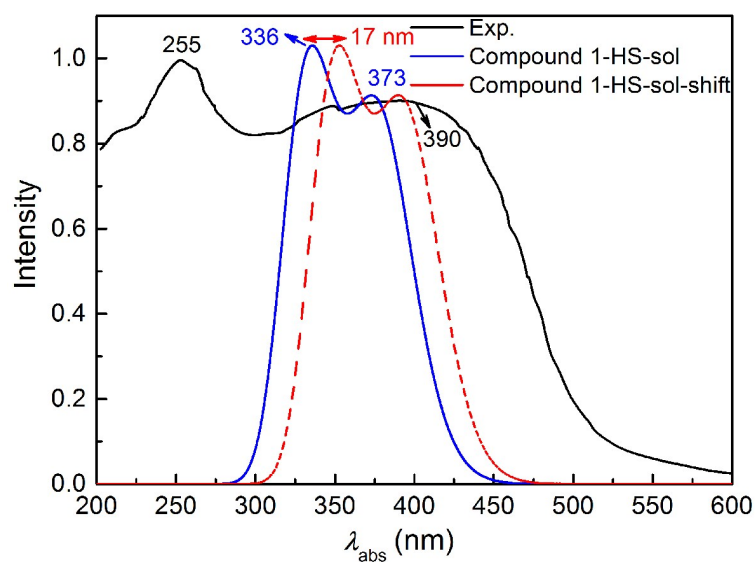

**Figure S6.** Experimental spectrum and electronic absorption spectra predicted by TD-PBE1PBE in methanol solvent for the high-spin state **1**. ( Gaussian HFWD is set to 0.333 eV).

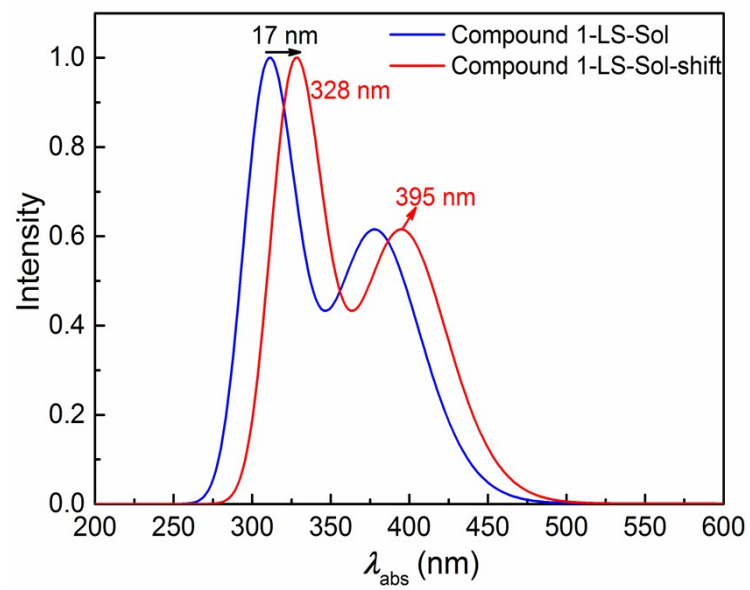

**Figure S7.** Electronic absorption spectra predicted by TD-PBE1PBE in methanol solvent for the low-spin state of **1**. ( Gaussian HFWD is set to 0.333 eV).



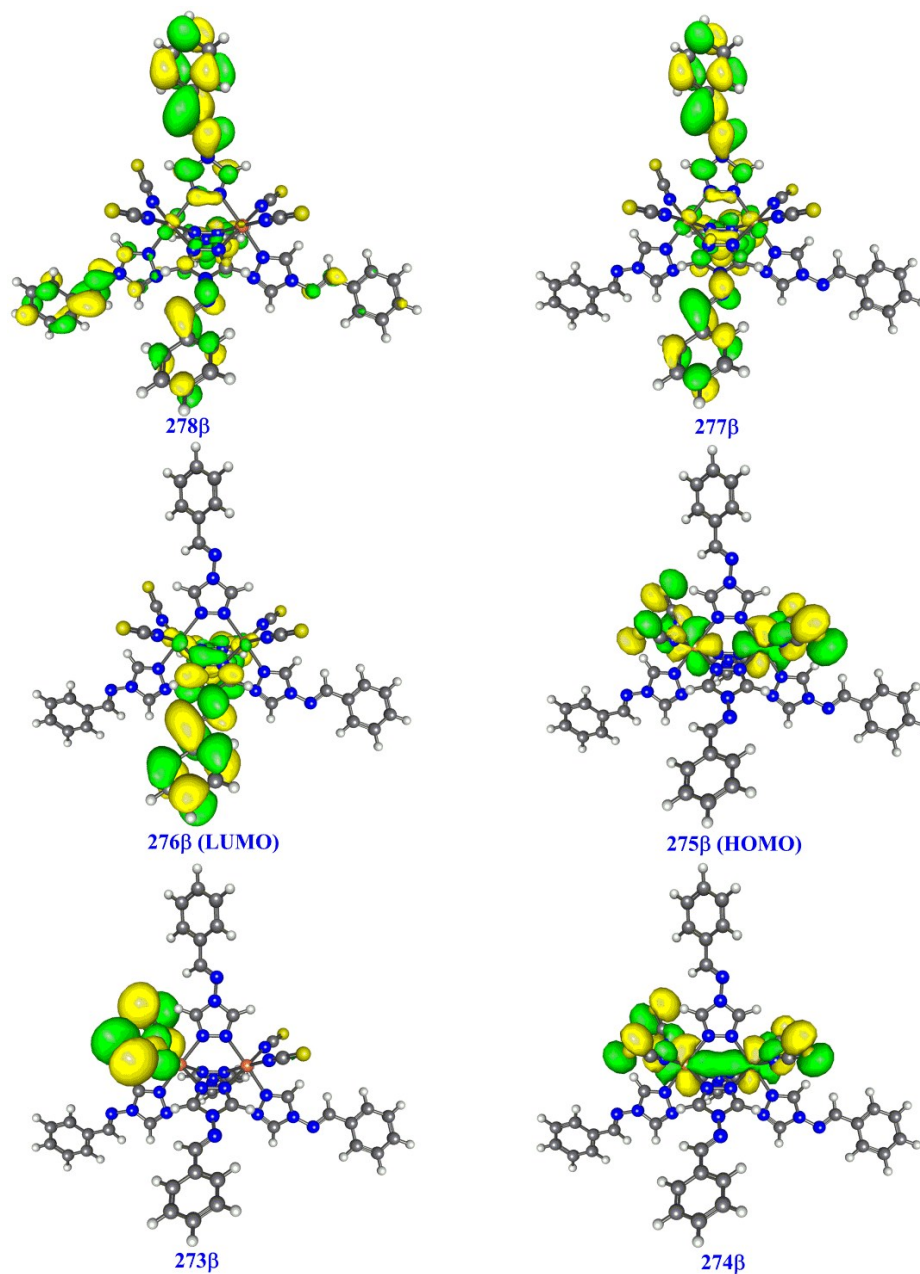

**Figure S8.** Selected key molecular orbitals of the  $S_0 \rightarrow S_1$  transition for the high-spin state. (no alpha-spin electron contribution, isovalue : 0.05 a.u.)

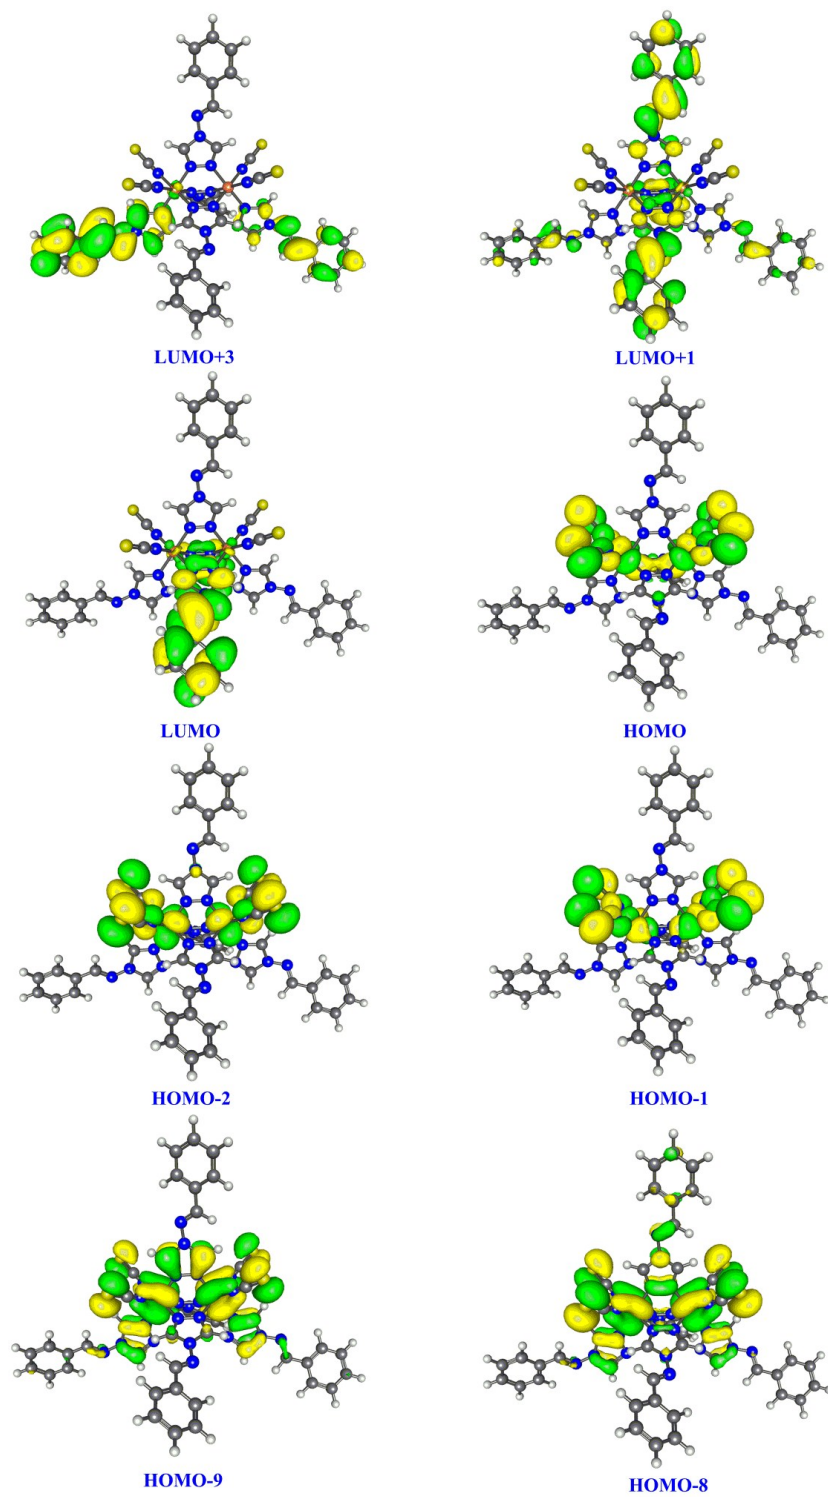

**Figure S9.** Selected key molecular orbitals of the  $S_0 \rightarrow S_1$  transition for the low-spin state. (isovalue : 0.05 a.u.).

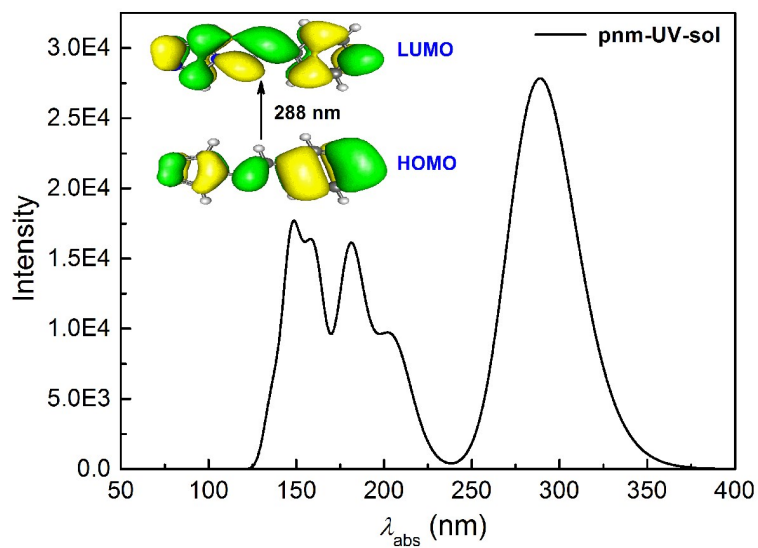

**Figure S10.** Electronic absorption spectrum calculated by TD-PBE1PBE in methanol solvent for the ligand pnm. ( Gaussian HFWD is set to 0.200 eV).

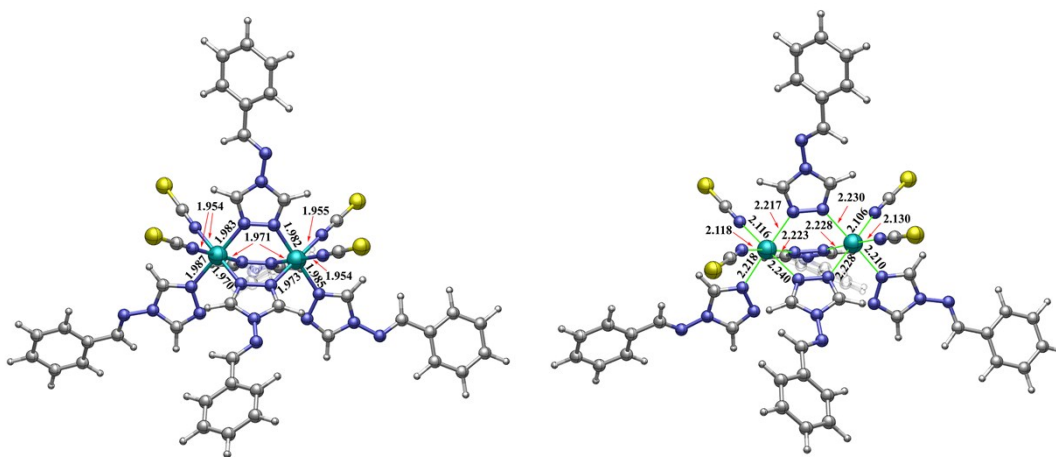

**Figure S11.** Left: crystal structure of **1** in the LS state obtained by theoretical calculation. Right: crystal structure of **1** in the HS state obtained by theoretical calculation.

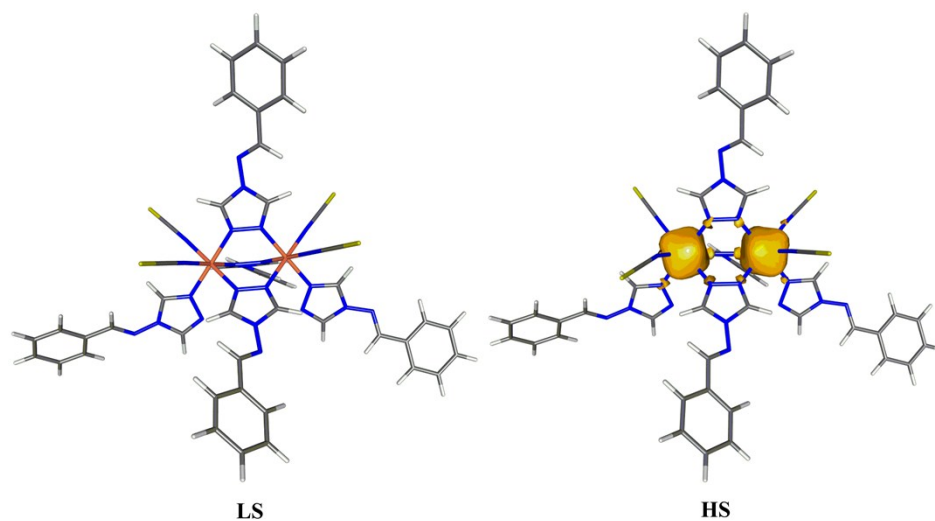

**Figure S12.** The electronic spin density of **1** in the HS state and in the LS state, respectively, which were obtained by theoretical calculation.

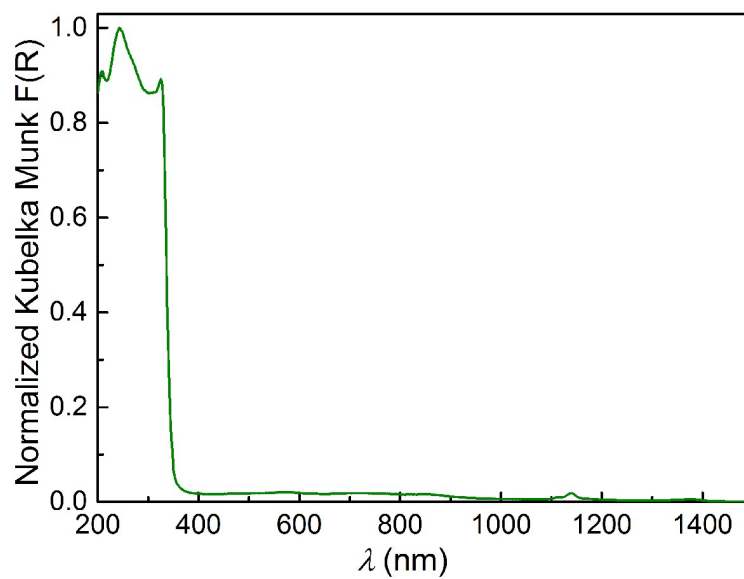

**Figure S13.** The normalized diffuse reflectivity spectra (DRS) of pnm.

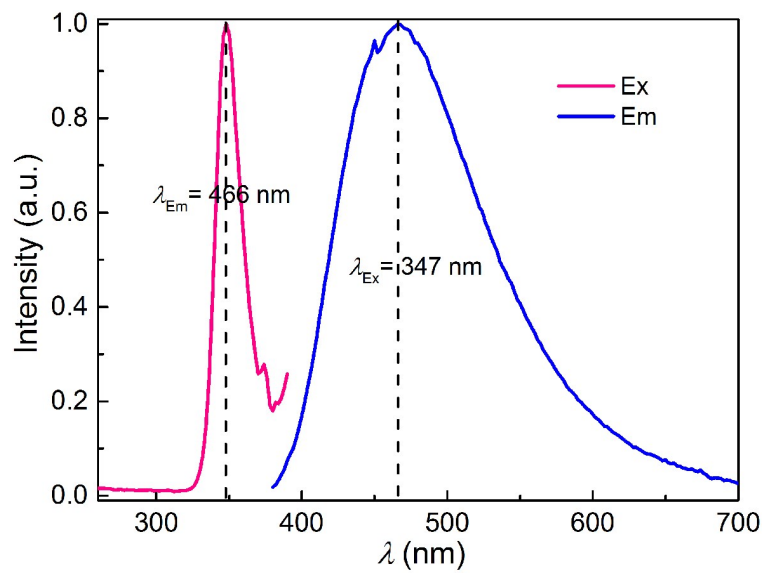

**Figure S14.** Normalized excitation spectra and emission spectra of pnm ( $\lambda_{\text{ex}} = 347$  nm and  $\lambda_{\text{em}} = 466$  nm).

## 6. REFERENCES

- (1) Frisch, M. J.; Trucks, G. W.; Schlegel, H. B.; Scuseria, G. E.; Robb, M. A.; Cheeseman, J. R.; Scalmani, G.; Barone, V.; Mennucci, B.; Petersson, G. A.; Nakatsuji, H.; Caricato, M.; Li, X.; Hratchian, H. P.; Izmaylov, A. F.; Bloino, J.; Zheng, G.; Sonnenberg, J. L.; Hada, M.; Ehara, M.; Toyota, K.; Fukuda, R.; Hasegawa, J.; Ishida, M.; Nakajima, T.; Honda, Y.; Kitao, O.; Nakai, H.; Vreven, T.; Montgomery, J. A., Jr.; Peralta, J. E.; Ogliaro, F.; Bearpark, M.; Heyd, J. J.; Brothers, E.; Kudin, K. N.; Staroverov, V. N.; Kobayashi, R.; Normand, J.; Raghavachari, K.; Rendell, A.; Burant, J. C.; Iyengar, S. S.; Tomasi, J.; Cossi, M.; Rega, N.; Millam, J. M.; Klene, M.; Knox, J. E.; Cross, J. B.; Bakken, V.; Adamo, C.; Jaramillo, J.; Gomperts, R.; Stratmann, R. E.; Yazyev, O.; Austin, A. J.; Cammi, R.; Pomelli, C.; Ochterski, J. W.; Martin, R. L.; Morokuma, K.; Zakrzewski, V. G.; Voth, G. A.; Salvador, P.; Dannenberg, J. J.; Dapprich, S.; Daniels, A. D.; Farkas, O.; Foresman, J. B.; Ortiz, J. V.; Cioslowski, J.; Fox, D. J. Gaussian 09, revision D.01; Gaussian, Inc. : Wallingford, CT, **2009**.
- (2) Ehlers A W, Böhme M, Dapprich S, Gobbi A, Höllwarth A, Jonas V, Köhler K F, Stegmann R, Veldkamp A, Frenking G. *Chem. Phys. Lett.* **1993**, *208*:111–114
- (3) Marenich, A. V.; Cramer, C. J.; Truhlar, D. G. *J. Phys. Chem. B* **2009**, *113*, 6378–6396.
- (4) Garcia, Y.; Robert, F.; Naik, A. D.; Zhou, G. Y.; Tinant, B.; Robeyns, K.; Michotte, S.; Piraux, L. *J. Am. Chem. Soc.* **2011**, *133*, 15850-15853
